1 **Natural Killer cells dampen the pathogenic features of recall responses to influenza**  
2 **infection.**

3 Jason P. Mooney<sup>1,2</sup>; Tedi Qendro<sup>1</sup>; Marianne Keith<sup>2</sup>; Adrian W. Philbey<sup>3</sup>; Helen T. Groves<sup>4</sup>; John  
4 S. Tregoning<sup>4</sup>; Martin R. Goodier<sup>1</sup>; Eleanor M. Riley<sup>1,2</sup>

5  
6  
7 <sup>1</sup> Department of Immunology and Infection, London School of Hygiene and Tropical Medicine,  
8 London, United Kingdom.

9 <sup>2</sup> Division of Infection and Immunity, The Roslin Institute, University of Edinburgh, Edinburgh,  
10 United Kingdom.

11 <sup>3</sup> Easter Bush Pathology, Royal (Dick) School of Veterinary Studies, University of Edinburgh,  
12 Edinburgh, United Kingdom.

13 <sup>4</sup> Department of Medicine, Imperial College London, London, United Kingdom.

14  
15 Correspondence address: Jason P Mooney PhD, The Roslin Institute, University of Edinburgh,  
16 Easter Bush, Midlothian, EH25 9RG, United Kingdom.

17 E-mail: [jason.mooney@roslin.ed.ac.uk](mailto:jason.mooney@roslin.ed.ac.uk)

18

19

20 Keywords: NK cell; influenza; lung; vaccine; diphtheria toxin; mice

21 **Abstract**

22 Despite evidence of augmented Natural Killer (NK) cell responses after influenza vaccination,  
23 the role of these cells in vaccine-induced immunity remains unclear. Here, we hypothesized that  
24 NK cells might increase viral clearance but possibly at the expense of increased severity of  
25 pathology. On the contrary, we found that NK cells serve a homeostatic role during influenza  
26 virus infection of vaccinated mice, allowing viral clearance with minimal pathology. Using a  
27 diphtheria toxin receptor transgenic mouse model, we were able to specifically deplete NKp46+  
28 NK cells through the administration of diphtheria toxin. Using this model, we assessed the effect  
29 of NK cell depletion prior to influenza challenge in vaccinated and unvaccinated mice. NK-  
30 depleted, vaccinated animals lost significantly more weight after viral challenge than vaccinated  
31 NK intact animals, indicating that NK cells ameliorate disease in vaccinated animals. However,  
32 there was also a significant reduction in viral load in NK-depleted, unvaccinated animals  
33 indicating that NK cells also constrain viral clearance. Depletion of NK cells after vaccination,  
34 but 21 days before infection, did not affect viral clearance or weight loss - indicating that it is the  
35 presence of NK cells during the infection itself that promotes homeostasis. Further work is  
36 needed to identify the mechanism(s) by which NK cells regulate adaptive immunity in influenza-  
37 vaccinated animals to allow efficient and effective virus control whilst simultaneously  
38 minimizing inflammation and pathology.

## 39 **Introduction**

40 Influenza viruses are a significant cause of respiratory tract infections, leading to seasonal  
41 epidemics and unpredictable pandemics. Globally, influenza affects approximately 20-30% of  
42 children and 5-10% of adults, resulting in 3-5 million cases of severe illness with up to 500,000  
43 deaths, annually (WHO, 2014). The very young, old, and immunocompromised are at greatest  
44 risk of succumbing to severe illness and death (Lewis, 2006). Currently, vaccination with live-  
45 attenuated or inactivated influenza virus is the most effective method for reducing infections at  
46 both the individual and population level (Cox and Subbarao, 1999; Ting et al., 2017).

47 Although adaptive immune responses play a key role in the resolution of influenza infection,  
48 innate immune responses play an essential role in restricting virus replication and thus limiting  
49 the scale of the initial infection (Iwasaki and Pillai, 2014). Amongst other innate immune players,  
50 Natural Killer (NK) cells can kill virus-infected cells and help to orchestrate nascent adaptive  
51 immune responses (White et al., 2008). Defects in NK cells are associated with increased  
52 susceptibility to viral infections (Biron et al., 1989; Orange, 2002). NK cell killing is mediated by  
53 cell surface cytotoxicity receptors (such as the natural cytotoxicity receptors NKp30, NKp44 and  
54 NKp46) binding to viral components or stress-induced ligands on the surface of virus-infected  
55 cells, leading to directed release of granzyme- and perforin-containing cytotoxic granules and/or  
56 Fas/Fas-ligand interactions (Smyth et al., 2005). Additionally, cytokine (particularly interferon  
57 (IFN)- $\gamma$ ) production by NK cells plays an integral role in shaping adaptive immunity (Vivier et  
58 al., 2008; Wagstaffe et al., 2018). For example, NK-derived IFN- $\gamma$  can activate dendritic cell  
59 migration, thus promoting T cell priming (Ge et al., 2012). Evidence for the importance of NK  
60 cells in influenza virus infection comes primarily from studies in mice, although conclusions vary  
61 depending on the precise model employed (Table 1). For example, depletion of NK cells with

62 anti-asialo GM1 antibody in mice and hamsters resulted in increased morbidity and mortality  
63 from influenza A virus infection (Stein-Streilein and Guffee, 1986). In addition, influenza  
64 infection is lethal in mice lacking the NK cell specific receptor NKp46 (NCR1) (Gazit et al.,  
65 2006), which has been reported to be a receptor for the influenza hemagglutinin (HA) protein  
66 (Arnon et al., 2001;Mandelboim et al., 2001). Conversely, others have reported that NK cell  
67 deficiency (whether through depletion with anti-asialo GM1 or anti-NK1.1, or due to a lack of  
68 interleukin (IL)-15) reduced weight loss and increased survival (Nakamura et al., 2010;Abdul-  
69 Careem et al., 2012;Zhou et al., 2013). Moreover, little is known regarding the role of NK cells in  
70 vaccine-induced immunity to influenza. We set out, therefore, to address the role of NK cells  
71 during acute influenza infection, before and after vaccination, using diphtheria-toxin (DT)  
72 mediated ablation of NK cells in genetically modified mice in which NKp46 expression drives  
73 expression of the DT receptor. Given that IL-2 produced from influenza-specific T cells is  
74 dependent on the NK cell driven IFN- $\gamma$  response in early influenza infection (He et al.,  
75 2004;Wagstaffe et al., 2018), we hypothesized that NK cell ablation would impair viral clearance  
76 and increase disease severity.

77

## 78 **Materials and Methods**

### 79 **Ethics statement**

80 All experiments were performed in accordance with United Kingdom (UK) Home Office  
81 Regulations under Project License 70/8291 and were approved by the animal welfare and ethical  
82 review board of the London School of Hygiene and Tropical Medicine (LSHTM).

### 83 **Mice**

84 C57BL/6J and C57BL/6-Gt(ROSA)26Sor<sup>tm1(HBEGF)Awai</sup>/J mice were purchased from Jackson  
85 Laboratories via Charles River (Tranent, UK). C57BL/6-NKp46:iCre<sup>+/+</sup> mice were kindly  
86 provided by Professor Eric Vivier (Centre d'Immunologie de Marseille-Luminy, Institut  
87 Universitaire de France, France). C57BL/6-Rosa26iDTR<sup>+/+</sup> and C57BL/6-NKp46:iCre<sup>+/+</sup> mice  
88 were crossed to generate F1 NKp46-iCre/Rosa26iDTR<sup>+/-</sup> (referred to as NKp46-DTR). Groups of  
89 NKp46-DTR mice were age- and sex-matched for all experiments, with influenza challenge  
90 occurring between 8 and 10 weeks of age. Both sexes of the F1 generation were used in this  
91 study, with 68 female and 106 male NKp46-DTR mice being used in total. The sexes of mice  
92 used in each experiment are shown in the figure panels ({M} male, {F} female) and figure  
93 legends. All mice were maintained in individually ventilated cages in a specified pathogen free  
94 facility.

#### 95 **Viral infection and vaccination**

96 Egg grown influenza A/California/4/2009 virus was kindly provided by Dr. John McCauley  
97 (Crick Worldwide Influenza Centre, The Francis Crick Institute, London UK) at 128  
98 hemagglutination units (HAU)/mL and stored at -80°C until use. For infections, mice were  
99 anesthetized by intraperitoneal (i.p.) injection of ketamine (100 mg/kg)/xylazine (10 mg/kg) and  
100 then inoculated intranasally (i.n.) with 30 µL of virus (0.5 HAU) diluted in Dulbecco's phosphate-  
101 buffered saline (DPBS) (Gibco, Loughborough UK). Mock-treated control mice were inoculated  
102 similarly with DPBS. Mice were monitored and weighed daily to assess infection and euthanized  
103 at day 4 post-infection (p.i.), or if they reached the humane endpoint of 20% loss of body weight  
104 at an earlier time point. Twenty eight days prior to challenge, some mice were vaccinated by i.p.  
105 injection of the human 2015-2016 seasonal influenza vaccine (human Sanofi-Pasteur-MSD  
106 inactivated trivalent influenza vaccine (split-virion) containing influenza haemagglutinin (HA),

107 including A/California/7/2009 (H1N1) pdm09-like strain NYMC X-179A), diluted 1:3 in DPBS  
108 with 500  $\mu$ L per mouse with a final dose of 5  $\mu$ g of each HA.

### 109 **Depletion of NK cells**

110 For selective depletion of NK cells, NKp46-diphtheria toxin receptor (NKp46-DTR) mice were  
111 injected i.p. with 1.25  $\mu$ g DT (diluted in 100  $\mu$ L DPBS) on days 25 and 28 post-vaccination.  
112 Alternatively, mice were injected once with 2.5  $\mu$ g DT and allowed to recover for 3 weeks prior  
113 to influenza challenge. Control (mock depleted) NKp46-DTR mice were injected i.p. with 100  
114  $\mu$ L DPBS.

### 115 **Isolation of lung cells and viral supernatant**

116 Lungs were aseptically removed from euthanized mice and stored in 5 mL DPBS on ice until  
117 processing. Lung single-cell suspensions were obtained using methods previously described  
118 (Sauer et al., 2007). Briefly, isolated lungs were cut into 2-3 mm<sup>2</sup> sections and resuspended in 5  
119 mL digestion solution of Roswell Park Memorial Institute (RPMI) 1640 Medium (Gibco)  
120 supplemented with 5 mM GlutaMax (Gibco), 5% (v/v) fetal bovine serum (Gibco), and 1% (v/v)  
121 Penicillin-Streptomycin solution (10,000 units/mL, Thermo Fisher Scientific, Loughborough  
122 UK). Digestion solutions contained DNaseI (20  $\mu$ g/mL) (Roche, Basel Switzerland), and  
123 Liberase<sup>TM</sup> (0.2 digestion units/lung) (Roche). The lung suspensions were digested at 37°C for  
124 60 minutes with gentle rotating and then processed on a gentleMACS dissociator (Miltenyi,  
125 Surrey UK). Lung homogenates were then sieved through a 40  $\mu$ m nylon filter to remove debris  
126 (BD Biosciences, Berkshire UK) and sieve washed with 5 mL DPBS. After centrifugation, an  
127 aliquot of lung supernatant was frozen at -70°C for downstream viral qPCR and IL-6 protein  
128 ELISA. Cell pellets were then resuspended in 5 mL ACK Lysis Buffer (Lonza, Edinburgh UK),  
129 washed and resuspended with DPBS for flow cytometry.

### 130 **Flow cytometry**

131 Cells were stained in 96-well U-bottom plates as described previously (Mooney et al., 2015).  
132 Briefly, cell suspensions were stained with antibodies to cell surface markers, fixed  
133 (Cytofix/Cytoperm; BD Biosciences) and stained for intracellular markers. Antibodies and dyes  
134 used for flow cytometry staining are shown in Table 2. Cells were acquired on an LSR II flow  
135 cytometer (BD Biosciences) using FACSDIVA software. Data were analyzed using FlowJo V10  
136 (Tree Star). Gates were initially set on singlets, followed by leukocytes (removing high SSC-A  
137 and low FSC-A) and live cells. Subsequent gates were based on unstained and/or FMO controls.

### 138 **Viral burden determination**

139 Influenza burden in lung-purified ribonucleic acid (RNA) was determined by one-step  
140 quantitative reverse transcription polymerase chain reaction (RT-qPCR) for the HA gene, as  
141 previously described (Lam et al., 2010). RNA was isolated from 500  $\mu$ L of frozen lung cell  
142 supernatant (PureLink Viral RNA Mini Kit, Thermo). As a standard, RNA was isolated from  
143 stock virus (128 HAU/mL) and diluted 1:5 starting from 2.3 HAU equivalents per well. Purified  
144 RNA (5  $\mu$ L of 25  $\mu$ L elution) was mixed with 5  $\mu$ L of TaqMan Fast Virus 1-step Master Mix  
145 (Thermo), 7  $\mu$ L of ultra-pure water, and 1  $\mu$ L each of forward primer SWH1-1080 (0.8  $\mu$ M,  
146 GATGGTAGATGGATGGTACGGTTAT), reverse primer SWH1-1159 (0.8  $\mu$ M,  
147 TTGTTAAGTAATYTCGTC AATGGCATT), and probe SWH1-1128 (0.25  $\mu$ M, FAM-  
148 AGGATATGCAGCCGACCT-NFQMGB) with amplification conditions: 55°C, 30min; 95°C,  
149 2min; 40 cycles of 95°C, 15 sec and 60°C, 30sec, on a 7900HT Fast RT-PCR system (Applied  
150 Biosystems, Loughborough UK). For viral burden from whole lung tissue, 500 ng of purified  
151 RNA (as reported below) was assayed in the same manner as above.

### 152 **RNA analysis from tissue**

153 Whole lung tissue was stored in RNAlater (Ambion, Loughborough UK) at post-mortem  
154 examination. RNA was extracted from tissue using RNeasy extraction kit (Qiagen, Manchester

155 UK) according to the manufacturer's instructions, using a TissueRuptor probe (Qiagen) for tissue  
156 homogenization. RNA was then treated with DNaseI (Ambion) to remove genomic  
157 deoxyribonucleic acid (DNA) contamination. For a quantitative analysis of messenger RNA  
158 (mRNA) levels, 1  $\mu$ g of total RNA from each sample was reverse transcribed in a 20  $\mu$ L volume  
159 (SuperScript IV VILO Master Mix; Thermo), and 2  $\mu$ L of complementary DNA (cDNA) was  
160 used for each real-time reaction. RT-qPCR was performed using the primers listed in Table 3,  
161 SYBR green (Applied Biosystems) and 7500 Real-Time PCR System (Applied Biosystems).  
162 Data were analyzed using the comparative threshold cycle (cT) method (Applied Biosystems).  
163 Target gene transcription of each sample was normalized to the respective levels of beta-Actin  
164 mRNA and represented as fold change over gene expression in control animals.

#### 165 **Plasma analysis**

166 Plasma was isolated by centrifugation of whole blood taken via cardiac puncture into a  
167 heparinized syringe and stored at -70°C. Plasma IL-6 levels were determined by sandwich  
168 enzyme-linked immunosorbent assay (ELISA) (Biolegend ELISA MAX Deluxe, London UK).  
169 Values below the blank were reported at the limit of detection for statistical purposes. To  
170 determine circulating influenza HA antibodies following influenza vaccination, a direct ELISA  
171 was done. Here, flat MaxiSorp 96-well plates (Nunc) were coated overnight with the vaccine  
172 (diluted 1:3000 in DPBS, or 0.01  $\mu$ g/mL HA) or live virus (1.28 HAU/mL) at 100  $\mu$ L. Using a  
173 commercial ELISA reagent kit (eBioscience catalogue number BMS412, Loughborough UK),  
174 plates were washed three times and blocked for 1 hour with 200  $\mu$ L of assay buffer. After  
175 washing, 100  $\mu$ L of serially-diluted plasma was incubated at room temperature (RT) for 2 hours.  
176 After washing, 100  $\mu$ L of sheep, anti-mouse immunoglobulin (Ig)-G horseradish peroxidase  
177 (HRP)-linked secondary antibody (Amersham catalogue number NA931, GE Healthcare,  
178 Buckinghamshire UK) diluted 1:4000 was incubated at RT for 2 hours before final washes and



179 3,3',5,5'-Tetramethylbenzidine (TMB) substrate development. Absorbance was determined at 450  
180 nm by SpectraMax M5 microplate reader (Molecular Devices, Wokingham UK). Vaccine take  
181 was confirmed for all vaccinated mice with HA-IgG ELISA at 1:100 dilution of plasma.

## 182 **Histopathology**

183 Sections were cut at 4  $\mu$ m thickness from formalin-fixed, paraffin-embedded whole lung tissues  
184 and stained with hematoxylin and eosin (H&E) by the University of Edinburgh Easter Bush  
185 Pathology Laboratory and scored, in a blinded fashion, for inflammation (vasculitis,  
186 bronchiolitis, and alveolitis), oedema (perivascular oedema, peribronchiolar oedema, and alveolar  
187 oedema), leukocyte infiltration (perivascular, peribronchiolar, and in alveolar walls) and  
188 neutrophil infiltration (perivascular, peribronchiolar, and in alveolar walls). Each criterion was  
189 scored numerically as unremarkable (0), mild (1), mild to moderate (2), moderate (3), moderate  
190 to marked (4), and marked (5). Photomicrographs of histological sections were taken using a 20x  
191 objective with an Olympus BX41 microscope using an Olympus DP72 camera.

## 192 **Statistical analysis**

193 Differences between groups were analysed by Mann-Whitney U test on combined data from two  
194 independent experiments, unless otherwise noted in legends. Spearman's correlation was used to  
195 identify statistically significant associations between weight loss, influenza burden and lung  
196 neutrophils. All analyses were conducted using GraphPad Prism 7.

197

198

## 199 **Results**

### 200 **Influenza vaccination reduces weight loss and viral burden in mice.**

201 To characterize the role of NK cells in influenza infection and immunization, we established a  
202 model of acute influenza infection in C57BL/6J mice (Fig. 1). C57BL/6J mice were infected i.n.

203 with 0.5 HAU of influenza strain A/California/04/2009. Infected mice developed an acute  
204 infection, losing 20% of their body weight by 4 days post-infection (Fig. 1A). Mice were also  
205 vaccinated, intraperitoneally with the human Sanofi-Pasteur-MSD inactivated trivalent influenza  
206 vaccine (split-virion), four weeks prior to influenza challenge. Vaccinated mice lost significantly  
207 less weight (Fig. 1A) and had lower viral burden in their lungs (Fig. 1B) compared to  
208 unvaccinated mice; the reduction in influenza burden in the lung correlated with reduced weight  
209 loss (Fig. 1C).

210 Acute influenza infection was marked by a significant increase in the frequency of CD11b+ cells  
211 in the lung, with a decrease in proportions of T (%CD3+) and B cells (%CD19+) (Fig. 1D). The  
212 frequency of NK cells, identified by NK1.1 and NKp46 co-expression (Walzer et al., 2007;Zhou  
213 et al., 2013), did not change after influenza infection (Fig 1D). However, there was a significant  
214 increase in the side-scatter (SSC) of the NK cell population (Fig. 1E), indicating increased  
215 activation (Brady et al., 2004;Skak et al., 2008;Marçais et al., 2014) and expression of NKp46, an  
216 activating NK cell receptor reported to bind influenza-derived HA (Gazit et al., 2006;Achdout et  
217 al., 2010;Glasner et al., 2012), was also increased in infected animals. Lastly, there was a  
218 significant increase in the frequency of NK cell activation marker CD69 (Fig. 1E). Together,  
219 these results suggest that the immune response to acute influenza infection, whether in a naïve or  
220 vaccinated animal, is characterized by an influx of CD11b+ cells and activated NK cells.

221  
222 **Depletion of NK cells prior to influenza challenge reduces lung virus burden but increases**  
223 **weight loss in vaccinated mice.**

224 To evaluate the contribution of NK cells to vaccine-induced protection from influenza infection,  
225 transgenic mice (NKp46-DTR) were selectively depleted of NK cells by injection of DT (Fig.

226 2A) three days before infection. DT treatment resulted in a robust depletion of NK cells from the  
227 lung (Fig. 2B) but did not change circulating antibodies established by vaccination (Fig. 2C).

228  
229 Depletion of NK cells prior to influenza challenge infection led to a significant decrease in  
230 influenza burden in the lung, regardless of vaccination status (Fig. 2D). Viral burden was 2.9 fold  
231 higher in naïve NK cell-intact mice than in naïve NK cell-depleted mice ( $p=0.002$ ) and 2.6 fold  
232 higher in vaccinated NK cell-intact mice than in vaccinated NK cell-depleted mice ( $p=0.007$ )  
233 (Fig. 2D). However, infected NK-depleted animals lost more weight in the 4 days post infection  
234 compared to NK-cell sufficient mice (Fig. 2E, male, and Fig. 2F, female). While unvaccinated  
235 mice reached their humane endpoint of 20% weight loss by 6 days post infection, vaccinated  
236 animals lost only 5% of their body weight and recovered to pre-infection weights by day 8 (Fig.  
237 2G). However, vaccinated and infected animals which lacked NK cells had prolonged weight loss  
238 which was more severe (10%) than in NK cell-intact vaccinated mice (5%) and recovered to  
239 baseline only by day 14 (Fig. 2G).

240  
241 **Reduction of IFN- $\gamma$  with influenza and NK cell depletion.**

242 Given that vaccinated NK cell-depleted animals lost more weight than vaccinated NK cell-intact  
243 animals despite a lower viral burden (Fig. 2), we next looked at inflammatory markers in the lung  
244 and plasma. In agreement with data from lung supernatants (Fig. 2D), viral burden determined  
245 from whole lung RNA preparations was significantly lower after NK cell depletion in  
246 unvaccinated animals ( $p=0.002$ ), and not in vaccinated animals ( $p=0.08$ ) (Fig. 3A). While *Il6* and  
247 *Ifn $\gamma$*  expression were increased with influenza infection (Fig. 3B), regardless of vaccination status  
248 and viral burden (Fig. 3A), transcripts of *Ifn $\gamma$*  were lower in NK cell depleted mice than in NK-  
249 intact mice (naïve  $p=0.004$ , vaccinated  $p=0.057$ ).

250  
251 Given that neutrophil influx into an influenza-infected lung can enhance viral control (Dienz et  
252 al., 2012), but can also contribute to tissue damage through the release of extracellular traps  
253 (Narasaraju et al., 2011), we wondered whether increased neutrophil activity in NK cell-depleted  
254 mice might explain our findings. We therefore determined transcript levels of neutrophil  
255 chemokines (*Cxcl1*, *Cxcl2*) and neutrophil secreted protein *Lcn2* but found no significant  
256 differences in transcript concentrations between NK cell-deficient and NK cell-intact animals  
257 (Fig. 3C). Lastly, we assessed circulating levels of IL-6 (which have been implicated in  
258 neutrophil-mediated effects (Dienz et al., 2012)) and found a tendency towards lower plasma IL-  
259 6 concentrations in both vaccinated and unvaccinated NK-depleted mice compared to NK cell-  
260 intact mice (vaccinated  $p=0.15$ , unvaccinated  $p=0.06$ ) (Fig. 3D), reflecting lower transcript levels  
261 in the lung (Fig. 3B). At the protein level in whole lungs after enzymatic digestion, IL-6 is lower  
262 in unvaccinated NK-depleted mice but not in vaccinated mice (vaccinated  $p=0.74$ , unvaccinated  
263  $p=0.05$ ) (Fig. 3E).

264  
265 **Influenza-mediated lung pathology in vaccinated and NK cell-depleted mice.**  
266 Given the decreased viral burden but increased weight loss upon influenza challenge in  
267 vaccinated NK cell-depleted mice compared to NK cell-sufficient mice (Fig. 2), we examined the  
268 lungs for histological evidence of pathology. H&E stained lung sections were assessed for  
269 pulmonary inflammation (vasculitis, bronchiolitis, and alveolitis), edema (perivascular,  
270 peribronchiolar, and alveolar), and infiltrating lymphocytes and neutrophils (perivascular,  
271 peribronchiolar, and alveolar) (Fig. 4; see Supplementary Table 1 for individual mouse data).  
272 Influenza infection alone induces severe pathology (Fig. 4). Reduced viral load after vaccination  
273 was accompanied by reduced pulmonary leukocyte influx ( $p=0.024$ ), with a trend for reduced

274 pulmonary inflammation ( $p=0.065$ ) and edema ( $p=0.09$ ). NK cell depletion *per se* (i.e. in the  
275 absence of infection) induced mild lung pathology with evidence of inflammation ( $p=0.008$ ) and  
276 leukocyte infiltration ( $p=0.006$ ). However, after influenza infection, pathology was significantly  
277 less severe in NK-depleted mice compared to NK cell-sufficient mice (inflammation  $p=0.04$ ,  
278 leukocyte infiltration  $p=0.048$ ). Interestingly, while weight loss was more severe in vaccinated  
279 and influenza challenged NK-depleted mice than in NK cell-sufficient mice, pathological  
280 changes in the lungs were not significantly different between the two groups of mice (Fig. 4).

281  
282 Finally, we quantified infiltrating leukocytes and neutrophils in the lung by flow cytometry (Fig.  
283 5). Influenza infection led to an infiltration of activated (CD69+) CD3+ T cells into the lung; this  
284 was not affected by NK-depletion but was attenuated in vaccinated mice (Fig. 5A). There were  
285 no obvious effects of infection or vaccination on CD19+ B cell populations in the lung; the  
286 modest apparent increase in B cell proportions in NK cell-depleted mice may simply reflect  
287 distortion of cell percentages by the absence of NK cells (Fig 5B). However, given that influenza  
288 infection increases the influx of CD11b+ cells into the lung (Fig. 1D), we further characterized  
289 influx of both inflammatory monocytes (%Ly6C-high) and neutrophils (%Ly6G+) in the lungs of  
290 NK-depleted mice. The modest reduction in leukocyte infiltration in the lung that was evident  
291 from histology (Fig. 4), was reflected in reduced infiltration of inflammatory monocytes into the  
292 lung in vaccinated NK cell-sufficient animals compared to unvaccinated animals ( $p=0.005$ ) and  
293 in infected NK cell-depleted animals compared to NK cell intact animals ( $p=0.002$ ) (Fig. 5C) but  
294 there was no additional effect of combining vaccination and NK cell depletion ( $p=0.99$ ).  
295 Neutrophil infiltration into the lung was also reduced by vaccination in NK cell intact mice ( $p =$   
296  $0.007$ ) but in this case, the effect was reversed by NK cell depletion such that neutrophil  
297 infiltration was higher in vaccinated NK cell-depleted mice than in vaccinated NK cell intact

298 mice,  $p=0.03$  for proportion of neutrophils (Fig. 5D) and  $p=0.06$  for absolute counts (data not  
299 shown), and correlated with weight loss (Fig. 5E). Taken together, these data suggest that the  
300 increased weight loss observed with influenza infection in NK cell-depleted vaccinated mice  
301 compared to NK cell intact vaccinated mice may be due, in part, to failure of NK cell-depleted  
302 mice to control neutrophil infiltration into the lungs, despite reduced viral burden.

303  
304 **Depletion of NK cells after vaccination, and subsequent repopulation, does not alter the**  
305 **response to influenza challenge in mice.**

306 To determine if the effects of NK cell depletion on post vaccination immunity to influenza were  
307 mediated by NK cells present at (and potentially affected by) vaccination (Goodier et al., 2016),  
308 we depleted NK cells (by a single treatment with 2.5  $\mu\text{g}$  of DT) 3 weeks after influenza  
309 vaccination (as previously) but then waited another 3 weeks before challenging the mice (to  
310 allow repopulation) (Fig. 6A). NK cells were initially (after 3 days) very effectively depleted by  
311 the DT treatment and, as predicted, the NK cell compartment did partially recover by the time of  
312 influenza challenge (Fig. 6B). In this case, removal of NK cells present at vaccination and  
313 subsequent NK cell repopulation resulted in influenza infections that were not significantly  
314 different from those in intact mice, with no significant differences in disease severity (weight  
315 loss; Fig. 6C), lung viral load (Fig. 6D) or circulating IL-6 concentrations (Fig. 6E). This  
316 experiment suggests that the effects of NK cell depletion on post vaccination immunity are due to  
317 the lack of all NK cells, rather than a lack of NK cell populations that were primed or activated  
318 by vaccination.

319

320

321 **Discussion**

322 The key findings of this study, summarized in Fig. 7, are that: (1) influenza vaccination is  
323 effective in reducing viral burden and weight loss in mice; (2) in both vaccinated and  
324 unvaccinated mice, NK cells ameliorate disease (weight loss) at the expense of delaying viral  
325 clearance; (3) that the magnitude of the effect on disease is greater in vaccinated than  
326 unvaccinated mice (2.5-fold greater weight loss vs 1.11-fold, respectively), and (4) the depletion  
327 of any ‘memory’ NK cells that might have been induced by vaccination did not alter the response  
328 to influenza virus in vaccinated mice. These data suggest that NK cells play an important  
329 homeostatic role, allowing influenza virus to be controlled without causing severe disease, and  
330 that this effect is enhanced by vaccination – indicating a role for NK cells in regulating the  
331 adaptive immune response. Our study therefore supports previous data suggesting an important  
332 role for NK cells in moderating adaptive immune effector mechanisms (Pallmer and Oxenius,  
333 2016).

334  
335 Previous work has suggested that the role of NK cells during influenza infection is dependent on  
336 the infecting dose of the virus, with NK cells being protective during low dose infection (0.5  
337 HAU) and pathogenic during high dose infection (5 HAU) (Zhou et al., 2013). Although we used  
338 the A/California/4/2009 strain of influenza rather than PR8 strain used by Zhou *et al*, we used an  
339 infecting dose that is similar to the low dose used by Zhou et al. (0.5 HAU) and saw a similar  
340 trend. Interestingly, an opposite effect was seen during murine cytomegalovirus (MCMV)  
341 infection where NK cells prevented pathology at high viral doses but enhanced disease at low  
342 doses (Waggoner et al., 2011). In our study, NK cell-depleted unvaccinated male mice lost  
343 significantly more weight than intact mice after infection (Fig. 2E); however this effect was not  
344 seen in female mice (Fig. 2F) suggesting that NK cells moderate disease severity differently in  
345 male and female mice despite the two sexes having similar viral loads. Regardless, in NK-dell

346 depleted and vaccinated mice we saw significant weight loss in both sexes (Fig. 2E and 2F),  
347 suggesting that sex differences are ablated by vaccination.

348

349 The mechanisms by which NK cells moderate adaptive immune responses are not fully  
350 understood. Our observation that NK cell depletion tended to increase neutrophil influx into the  
351 lungs of influenza infected mice, and significantly increased neutrophil accumulation in lungs of  
352 vaccinated mice, suggests that NK cells may serve to limit neutrophil migration to sites of  
353 infection. This would be in line with studies showing that neutrophils are important in controlling  
354 influenza virus infection (Tate et al., 2008;Tate et al., 2009;Tate et al., 2011) but can contribute to  
355 severe pulmonary pathology (Tumpey et al., 2005;Perrone et al., 2008;Feng et al., 2015).

356

357 Another possibility is that NK cells regulate the accumulation of adaptive, cytotoxic (CD8+)  
358 effector T cells at the site of infection, thereby reducing tissue damage but slowing viral  
359 clearance. In RSV infection, for example, CD8+ cells are directly associated with weight loss and  
360 depleting them reduces disease (Tregoning et al., 2008). NK cells have been shown to eliminate  
361 activated CD4+ and CD8+ T cells in different model systems (Waggoner et al., 2011;Lang et al.,  
362 2012;Pallmer and Oxenius, 2016), mediated by either perforin or TNF-related apoptosis-inducing  
363 ligand (TRAIL) (Peppas et al., 2013;Schuster et al., 2014). However, thus far, in influenza  
364 vaccination models CD8+ T cells appear to contribute to both reduced viral load and reduced  
365 disease severity (Lambert et al., 2016). Unfortunately, we did not determine CD8 T cell  
366 responses in this current study and therefore further work is needed to determine whether the lack  
367 of NK cells removes the brake on adaptive T cell responses during influenza infection.

368



369 In a recent study (Zamora et al., 2017), murine NK cells licensed on self MHC were shown to  
370 localize to infected lung tissue and produce IFN- $\gamma$  after influenza A (strain PR8) infection.  
371 Unlicensed NK cells, in contrast, were enriched in draining (mediastinal) lymph nodes, produced  
372 GM-CSF and promoted dendritic cell infiltration and CD8<sup>+</sup> T cell responses. It is therefore likely  
373 that distinct subsets of NK cells may selectively promote inflammation or antiviral immunity.  
374 Furthermore, this may differ depending on levels of adaptive immunity.

375

376 In humans, memory-like NK cells can be generated by cytokine or influenza virus pre-activation;  
377 these cells show enhanced responses to cytokines or influenza virus upon re-stimulation  
378 (O'Sullivan et al., 2015; Goodier et al., 2016; Wagstaffe et al., 2018). It is conceivable that prior  
379 activation of NK cells, for example by vaccine-induced inflammatory cytokines, could influence  
380 the migration and function of these cells upon viral challenge. Certainly, human nasal challenge  
381 with Fluenz induces a local (nasal mucosal) innate cytokine signature with potential NK cell  
382 activating capacity (Jochems et al., 2018). Nevertheless, we wondered whether a similar  
383 phenomenon might also be apparent in this mouse model (where more precise dissection of the  
384 underlying local mechanism of NK cell enhancement might be possible). Therefore, we depleted  
385 NK cells immediately after vaccination (thus removing any putative 'memory' NK cells, defined  
386 as cells with altered function after prior exposure), and rested the mice for three weeks to allow  
387 repopulation before challenging with influenza virus. We observed no differences in the outcome  
388 of influenza infection between these NK cell-depleted/repopulated vaccinated mice and intact,  
389 vaccinated mice. These data suggest that "memory" NK cells are not induced by influenza  
390 vaccination in mice or that any such cells are no more effective at moderating adaptive responses  
391 to influenza than are "naïve" NK cells. In mice, cytokine-induced memory-like NK cells can be  
392 adoptively transferred and maintained by homeostatic proliferation (Keppel et al., 2013), but have

393 to date not been demonstrated after influenza vaccination. Human studies have been limited to  
394 peripheral blood and further investigations are needed to test how NK cells influence  
395 inflammatory cellular infiltrates at the site of virus infection. Vaccination and challenge studies  
396 (with local mucosal sampling for virus, cellular infiltrates and cytokine production) are now  
397 needed to reveal the impact of vaccine-induced NK cell priming and “memory” generation on  
398 virus replication and pathology.

399  
400 There are some important caveats to keep in mind, however. Firstly, in contrast to previous  
401 studies using mice lacking NK cells at the time of infection or vaccination, or depleted of NK  
402 cells with antibodies on animals of different sexes (Table 1), we used an inducible, endogenous  
403 method of NK cell depletion which may have fewer limitations (Walzer et al., 2007).  
404 Nevertheless, DT treatment alone lead to some limited weight loss and pulmonary pathology,  
405 likely due to death of approx. 15% of lung leukocytes, although there was no induction of  
406 inflammatory cytokines nor any influx of immune cells into the lung. It remains a possibility,  
407 therefore, that the mild inflammation induced by NK cell depletion may have affected the  
408 outcome of the experiments. Further, sex differences in influenza-mediated lung pathology have  
409 been noted (Klein et al., 2012). Secondly, the ethically-approved humane end point for our study  
410 was deemed to be 20% weight loss (after which animals were euthanized), essentially precluding  
411 determination of long-term survival after NK cell depletion but some studies have shown only  
412 limited correlation between weight loss and long term survival (Abdul-Careem et al., 2012), with  
413 viral challenge dose a greater predictor of survival despite similar weight loss kinetics (Zhou et  
414 al., 2013). A further caveat of the Rosa-DT conditional ‘NK cell’ depletion system used here is a  
415 potential parallel depletion of mature NKp46+ ILC1 and ILC3 cells (Cortez et al., 2015). Studies  
416 in deficient *ncr1*<sup>gfp</sup> mice, which are susceptible to lethal influenza A infection, demonstrate

417 systemic loss of ILC1, whilst maintaining NKp46 negative NK cell subsets (Gazit et al.,  
418 2006;Wang et al., 2018). Although rare in the non-pathologic lung, our studies do therefore not  
419 exclude a potential contribution of ILC-1s to inflammatory processes after influenza vaccination  
420 or challenge infection. Lastly, characterization of cytokine protein levels in the bronchoalveolar  
421 lavage fluid would be beneficial in understanding transcriptional changes observed in this study.

422  
423 To summarize, we have demonstrated that NK cells play a homeostatic role in adaptive immunity  
424 to influenza infection in mice. While the precise mechanism by which NK cells modulate  
425 adaptive immunity remains unclear, their presence is crucial for resolving infection with minimal  
426 immune pathology. Further studies to determine the mechanism(s) at play may inform the design  
427 of safer and more effective influenza vaccines.

428  
429 **Acknowledgements**  
430 We thank Professor Eric Vivier (Aix-Marseille, France) for generously supplying breeding pairs  
431 of C57BL/6J-NKp46:iCre<sup>+/+</sup> mice, the LSHTM animal care staff for their technical assistance,  
432 John McCauley and Andreas Wack (Francis Crick Institute) for advice on the mouse influenza  
433 model and Christian Bottomley (LSHTM) for statistical advice.

434  
435 **Author Contributions Statement**  
436 Study concept and design: JM, MG, and ER; data generation and analysis: JM, TQ,  
437 MK, AP, HG; drafting and revision of manuscript: JM, TQ, MK, AP, JT, MG, and ER;  
438 critical appraisal and approval for submission: all authors.

439

440 **Conflict of Interest Statement**

441 The authors have no conflicts of interests to declare.

442

443 **Funding**

444 This work was funded by the UK Medical Research Council (MRC) and the UK Department for

445 International Development (DFID) under the MRC/DFID Concordat agreement (ER; G1000808).

446 MG was supported by the Innovative Medicines Initiative 2 Joint Undertaking (no. 115861) – a

447 joint undertaking receives support from the Europeans Union’s Horizon 2020 Research and

448 Innovation Programme and Association. Lastly, HG was supported by an MRC DTP studentship

449 (no. MR/K501281/1).

450 **Data Availability Statement**

451 The raw data supporting the conclusions of this manuscript will be made available by the authors,

452 without undue reservation, to any qualified researcher.

453 **References**

- 454  
455 Abdul-Careem, M.F., Mian, M.F., Yue, G., Gillgrass, A., Chenoweth, M.J., Barra, N.G., Chew,  
456 M.V., Chan, T., Al-Garawi, A.A., Jordana, M., and Ashkar, A.A. (2012). Critical role of  
457 natural killer cells in lung immunopathology during influenza infection in mice. *The*  
458 *Journal of infectious diseases* 206, 167-177.
- 459 Achdout, H., Meninger, T., Hirsh, S., Glasner, A., Bar-On, Y., Gur, C., Porgador, A.,  
460 Mendelson, M., Mandelboim, M., and Mandelboim, O. (2010). Killing of Avian and Swine  
461 Influenza Virus by Natural Killer Cells. *Journal of Virology* 84, 3993-4001.
- 462 Arnon, T.I., Lev, M., Katz, G., Chernobrov, Y., Porgador, A., and Mandelboim, O. (2001).  
463 Recognition of viral hemagglutinins by NKp44 but not by NKp30. *European Journal of*  
464 *Immunology* 31, 2680-2689.
- 465 Biassoni, R., Pessino, A., Bottino, C., Pende, D., Moretta, L., and Moretta, A. (1999). The murine  
466 homologue of the human NKp46, a triggering receptor involved in the induction of natural  
467 cytotoxicity. *European journal of immunology* 29, 1014-1020.
- 468 Biron, C.A., Byron, K.S., and Sullivan, J.L. (1989). Severe Herpesvirus Infections in an  
469 Adolescent without Natural-Killer Cells. *New England Journal of Medicine* 320, 1731-  
470 1735.
- 471 Brady, J., Hayakawa, Y., Smyth, M.J., and Nutt, S.L. (2004). IL-21 Induces the Functional  
472 Maturation of Murine NK Cells. *The Journal of Immunology* 172, 2048-2058.
- 473 Cortez, V.S., and Colonna, M. (2016). Diversity and function of group 1 innate lymphoid cells.  
474 *Immunology Letters* 179, 19-24.
- 475 Cortez, V.S., Robinette, M.L., and Colonna, M. (2015). Innate lymphoid cells: new insights into  
476 function and development. *Current Opinion in Immunology* 32, 71-77.
- 477 Cox, N.J., and Subbarao, K. (1999). Influenza. *The Lancet* 354, 1277-1282.
- 478 Dienz, O., Rud, J.G., Eaton, S.M., Lanthier, P.A., Burg, E., Drew, A., Bunn, J., Suratt, B.T.,  
479 Haynes, L., and Rincon, M. (2012). Essential role of IL-6 in protection against H1N1  
480 influenza virus by promoting neutrophil survival in the lung. *Mucosal Immunology* 5, 258.
- 481 Feng, Y., Hu, L., Lu, S., Chen, Q., Zheng, Y., Zeng, D., Zhang, J., Zhang, A., Chen, L., Hu, Y.,  
482 and Zhang, Z. (2015). Molecular pathology analyses of two fatal human infections of  
483 avian influenza A(H7N9) virus. *J Clin Pathol* 68, 57-63.
- 484 Gazit, R., Gruda, R., Elboim, M., Arnon, T.I., Katz, G., Achdout, H., Hanna, J., Qimron, U.,  
485 Landau, G., Greenbaum, E., Zakay-Rones, Z., Porgador, A., and Mandelboim, O. (2006).  
486 Lethal influenza infection in the absence of the natural killer cell receptor gene Ncr1.  
487 *Nature Immunology* 7, 517-523.
- 488 Ge, M.Q., Ho, A.W., Tang, Y., Wong, K.H., Chua, B.Y., Gasser, S., and Kemeny, D.M. (2012).  
489 NK cells regulate CD8+ T cell priming and dendritic cell migration during influenza A  
490 infection by IFN-gamma and perforin-dependent mechanisms. *J Immunol* 189, 2099-  
491 2109.
- 492 Glasner, A., Zurunic, A., Meninger, T., Lenac Rovis, T., Tsukerman, P., Bar-On, Y., Yamin, R.,  
493 Meyers, A.F.A., Mandelboim, M., Jonjic, S., and Mandelboim, O. (2012). Elucidating the  
494 Mechanisms of Influenza Virus Recognition by Ncr1. *PLoS ONE* 7, e36837.
- 495 Goodier, M.R., Rodriguez-Galan, A., Lusa, C., Nielsen, C.M., Darboe, A., Moldoveanu, A.L.,  
496 White, M.J., Behrens, R., and Riley, E.M. (2016). Influenza Vaccination Generates  
497 Cytokine-Induced Memory-like NK Cells: Impact of Human Cytomegalovirus Infection.  
498 *The Journal of Immunology*.
- 499 He, X.-S., Draghi, M., Mahmood, K., Holmes, T.H., Kemble, G.W., Dekker, C.L., Arvin, A.M.,  
500 Parham, P., and Greenberg, H.B. (2004). T cell-dependent production of IFN- $\gamma$  by NK  
501 cells in response to influenza A virus. *The Journal of Clinical Investigation* 114, 1812-  
502 1819.

- 503 Itsumi, M., Yoshikai, Y., and Yamada, H. (2009). IL-15 is critical for the maintenance and innate  
504 functions of self-specific CD8(+) T cells. *European Journal of Immunology* 39, 1784-  
505 1793.
- 506 Iwasaki, A., and Pillai, P.S. (2014). Innate immunity to influenza virus infection. *Nat Rev Immunol*  
507 14, 315-328.
- 508 Jochems, S.P., Marcon, F., Carniel, B.F., Holloway, M., Mitsi, E., Smith, E., Gritzfeld, J.F.,  
509 Solórzano, C., Reiné, J., Pojar, S., Nikolaou, E., German, E.L., Hyder-Wright, A., Hill, H.,  
510 Hales, C., De Steenhuijsen Piters, W.a.A., Bogaert, D., Adler, H., Zaidi, S., Connor, V.,  
511 Gordon, S.B., Rylance, J., Nakaya, H.I., and Ferreira, D.M. (2018). Inflammation induced  
512 by influenza virus impairs human innate immune control of pneumococcus. *Nature*  
513 *Immunology* 19, 1299-1308.
- 514 Keppel, M.P., Yang, L., and Cooper, M.A. (2013). Murine NK cell intrinsic cytokine-induced  
515 memory-like responses are maintained following homeostatic proliferation. *Journal of*  
516 *immunology (Baltimore, Md. : 1950)* 190, 4754-4762.
- 517 Klein, S.L., Hodgson, A., and Robinson, D.P. (2012). Mechanisms of sex disparities in influenza  
518 pathogenesis. *Journal of leukocyte biology* 92, 67-73.
- 519 Kos, F.J., and Engleman, E.G. (1996). Role of Natural Killer Cells in the Generation of Influenza  
520 Virus-Specific Cytotoxic T Cells. *Cellular Immunology* 173, 1-6.
- 521 Lam, W.-Y., Leung, T.-F., Lee, N., Cheung, J.L.K., Yeung, A.C.M., Ho, Y.I.I., Chan, R.C.W.,  
522 Fung, K.S.C., Barr, I.G., Hui, D.S.C., Sung, J.J.Y., and Chan, P.K.S. (2010).  
523 Development and comparison of molecular assays for the rapid detection of the  
524 pandemic influenza A (H1N1) 2009 virus. *Journal of Medical Virology* 82, 675-683.
- 525 Lambert, L., Kinnear, E., McDonald, J.U., Grodeland, G., Bogen, B., Stubsrud, E., Lindeberg,  
526 M.M., Fredriksen, A.B., and Tregoning, J.S. (2016). DNA Vaccines Encoding Antigen  
527 Targeted to MHC Class II Induce Influenza-Specific CD8(+) T Cell Responses, Enabling  
528 Faster Resolution of Influenza Disease. *Front Immunol* 7, 321.
- 529 Lang, P.A., Lang, K.S., Xu, H.C., Grusdat, M., Parish, I.A., Recher, M., Elford, A.R., Dhanji, S.,  
530 Shaabani, N., Tran, C.W., Dissanayake, D., Rahbar, R., Ghazarian, M., Brustle, A., Fine,  
531 J., Chen, P., Weaver, C.T., Klose, C., Diefenbach, A., Haussinger, D., Carlyle, J.R.,  
532 Kaech, S.M., Mak, T.W., and Ohashi, P.S. (2012). Natural killer cell activation enhances  
533 immune pathology and promotes chronic infection by limiting CD8+ T-cell immunity. *Proc*  
534 *Natl Acad Sci U S A* 109, 1210-1215.
- 535 Lewis, D.B. (2006). Avian flu to human influenza. *Annual Review of Medicine* 57, 139-154.
- 536 Lodolce, J.P., Boone, D.L., Chai, S., Swain, R.E., Dassopoulos, T., Trettin, S., and Ma, A.  
537 (1998). IL-15 receptor maintains lymphoid homeostasis by supporting lymphocyte  
538 homing and proliferation. *Immunity* 9, 669-676.
- 539 Mandelboim, O., Lieberman, N., Lev, M., Paul, L., Arnon, T.I., Bushkin, Y., Davis, D.M.,  
540 Strominger, J.L., Yewdell, J.W., and Porgador, A. (2001). Recognition of haemagglutinins  
541 on virus-infected cells by NKp46 activates lysis by human NK cells. *Nature* 409, 1055-  
542 1060.
- 543 Marçais, A., Cherfils-Vicini, J., Viant, C., Degouve, S., Viel, S., Fenis, A., Rabilloud, J., Mayol, K.,  
544 Tavares, A., Bienvenu, J., Gangloff, Y.-G., Gilson, E., Vivier, E., and Walzer, T. (2014).  
545 The metabolic checkpoint kinase mTOR is essential for interleukin-15 signaling during  
546 NK cell development and activation. *Nature immunology* 15, 749-757.
- 547 Mooney, J.P., Lokken, K.L., Byndloss, M.X., George, M.D., Velazquez, E.M., Faber, F., Butler,  
548 B.P., Walker, G.T., Ali, M.M., Potts, R., Tiffany, C., Ahmer, B.M., Luckhart, S., and Tsois,  
549 R.M. (2015). Inflammation-associated alterations to the intestinal microbiota reduce  
550 colonization resistance against non-typhoidal Salmonella during concurrent malaria  
551 parasite infection. *Sci Rep* 5, 14603.

- 552 Nakamura, R., Maeda, N., Shibata, K., Yamada, H., Kase, T., and Yoshikai, Y. (2010).  
553 Interleukin-15 Is Critical in the Pathogenesis of Influenza A Virus-Induced Acute Lung  
554 Injury. *Journal of Virology* 84, 5574-5582.
- 555 Narasaraju, T., Yang, E., Samy, R.P., Ng, H.H., Poh, W.P., Liew, A.-A., Phoon, M.C., Van  
556 Rooijen, N., and Chow, V.T. (2011). Excessive Neutrophils and Neutrophil Extracellular  
557 Traps Contribute to Acute Lung Injury of Influenza Pneumonitis. *The American Journal of*  
558 *Pathology* 179, 199-210.
- 559 Nishikado, H., Mukai, K., Kawano, Y., Minegishi, Y., and Karasuyama, H. (2011). NK cell-  
560 depleting anti-asialo GM1 antibody exhibits a lethal off-target effect on basophils in vivo.  
561 *J Immunol* 186, 5766-5771.
- 562 Nogusa, S., Ritz, B.W., Kassim, S.H., Jennings, S.R., and Gardner, E.M. (2008).  
563 Characterization of age-related changes in natural killer cells during primary influenza  
564 infection in mice. *Mechanisms of Ageing and Development* 129, 223-230.
- 565 O'sullivan, T.E., Sun, J.C., and Lanier, L.L. (2015). Natural Killer Cell Memory. *Immunity* 43,  
566 634-645.
- 567 Orange, J.S. (2002). Human natural killer cell deficiencies and susceptibility to infection.  
568 *Microbes and Infection* 4, 1545-1558.
- 569 Pallmer, K., and Oxenius, A. (2016). Recognition and Regulation of T Cells by NK Cells. *Front*  
570 *Immunol* 7, 251.
- 571 Peppas, D., Gill, U.S., Reynolds, G., Easom, N.J., Pallett, L.J., Schurich, A., Micco, L., Nebbia,  
572 G., Singh, H.D., Adams, D.H., Kennedy, P.T., and Maini, M.K. (2013). Up-regulation of a  
573 death receptor renders antiviral T cells susceptible to NK cell-mediated deletion. *J Exp*  
574 *Med* 210, 99-114.
- 575 Perrone, L.A., Plowden, J.K., Garcia-Sastre, A., Katz, J.M., and Tumpey, T.M. (2008). H5N1 and  
576 1918 pandemic influenza virus infection results in early and excessive infiltration of  
577 macrophages and neutrophils in the lungs of mice. *PLoS Pathog* 4, e1000115.
- 578 Sauer, K.A., Scholtes, P., Karwot, R., and Finotto, S. (2007). Isolation of CD4+ T cells from  
579 murine lungs: a method to analyze ongoing immune responses in the lung. *Nat.*  
580 *Protocols* 1, 2870-2875.
- 581 Schuster, I.S., Wikstrom, M.E., Brizard, G., Coudert, J.D., Estcourt, M.J., Manzur, M., O'reilly,  
582 L.A., Smyth, M.J., Trapani, J.A., Hill, G.R., Andoniou, C.E., and Degli-Esposti, M.A.  
583 (2014). TRAIL+ NK cells control CD4+ T cell responses during chronic viral infection to  
584 limit autoimmunity. *Immunity* 41, 646-656.
- 585 Skak, K., Frederiksen, K.S., and Lundsgaard, D. (2008). Interleukin-21 activates human natural  
586 killer cells and modulates their surface receptor expression. *Immunology* 123, 575-583.
- 587 Smyth, M.J., Cretney, E., Kelly, J.M., Westwood, J.A., Street, S.E.A., Yagita, H., Takeda, K.,  
588 Dommelen, S.L.H.V., Degli-Esposti, M.A., and Hayakawa, Y. (2005). Activation of NK cell  
589 cytotoxicity. *Molecular Immunology* 42, 501-510.
- 590 Stein-Streilein, J., and Guffee, J. (1986). In vivo treatment of mice and hamsters with antibodies  
591 to asialo GM1 increases morbidity and mortality to pulmonary influenza infection. *J*  
592 *Immunol* 136, 1435-1441.
- 593 Tate, M.D., Brooks, A.G., and Reading, P.C. (2008). The role of neutrophils in the upper and  
594 lower respiratory tract during influenza virus infection of mice. *Respir Res* 9, 57.
- 595 Tate, M.D., Deng, Y.M., Jones, J.E., Anderson, G.P., Brooks, A.G., and Reading, P.C. (2009).  
596 Neutrophils ameliorate lung injury and the development of severe disease during  
597 influenza infection. *J Immunol* 183, 7441-7450.
- 598 Tate, M.D., Ioannidis, L.J., Croker, B., Brown, L.E., Brooks, A.G., and Reading, P.C. (2011). The  
599 role of neutrophils during mild and severe influenza virus infections of mice. *PLoS One* 6,  
600 e17618.
- 601 Ting, E.E.K., Sander, B., and Ungar, W.J. (2017). Systematic review of the cost-effectiveness of  
602 influenza immunization programs. *Vaccine* 35, 1828-1843.

- 603 Tregoning, J.S., Yamaguchi, Y., Harker, J., Wang, B., and Openshaw, P.J. (2008). The role of T  
604 cells in the enhancement of respiratory syncytial virus infection severity during adult  
605 reinfection of neonatally sensitized mice. *J Virol* 82, 4115-4124.
- 606 Tumpey, T.M., Garcia-Sastre, A., Taubenberger, J.K., Palese, P., Swayne, D.E., Pantin-  
607 Jackwood, M.J., Schultz-Cherry, S., Solorzano, A., Van Rooijen, N., Katz, J.M., and  
608 Basler, C.F. (2005). Pathogenicity of influenza viruses with genes from the 1918  
609 pandemic virus: functional roles of alveolar macrophages and neutrophils in limiting virus  
610 replication and mortality in mice. *J Virol* 79, 14933-14944.
- 611 Vivier, E., Tomasello, E., Baratin, M., Walzer, T., and Ugolini, S. (2008). Functions of natural  
612 killer cells. *Nat Immunol* 9, 503-510.
- 613 Waggoner, S.N., Cornberg, M., Selin, L.K., and Welsh, R.M. (2011). Natural killer cells act as  
614 rheostats modulating antiviral T cells. *Nature* 481, 394-398.
- 615 Wagstaffe, H.R., Mooney, J.P., Riley, E.M., and Goodier, M.R. (2018). Vaccinating for natural  
616 killer cell effector functions. *Clin Transl Immunology* 7, e1010.
- 617 Walzer, T., Bléry, M., Chaix, J., Fuseri, N., Chasson, L., Robbins, S.H., Jaeger, S., André, P.,  
618 Gauthier, L., Daniel, L., Chemin, K., Morel, Y., Dalod, M., Imbert, J., Pierres, M., Moretta,  
619 A., Romagné, F., and Vivier, E. (2007). Identification, activation, and selective in vivo  
620 ablation of mouse NK cells via NKp46. *Proceedings of the National Academy of Sciences  
621 of the United States of America* 104, 3384-3389.
- 622 Wang, Y., Dong, W., Zhang, Y., Caligiuri, M.A., and Yu, J. (2018). Dependence of innate  
623 lymphoid cell 1 development on NKp46. *PLOS Biology* 16, e2004867.
- 624 White, M.R., Doss, M., Boland, P., Teclé, T., and Hartshorn, K.L. (2008). Innate immunity to  
625 influenza virus: implications for future therapy. *Expert review of clinical immunology* 4,  
626 497-514.
- 627 Who (2014). *Influenza (Seasonal)* [Online]. [Accessed 8/7/16 2016].
- 628 Zamora, A.E., Aguilar, E.G., Sungur, C.M., Khuat, L.T., Dunai, C., Lochhead, G.R., Du, J.,  
629 Pomeroy, C., Blazar, B.R., Longo, D.L., Venstrom, J.M., Baumgarth, N., and Murphy,  
630 W.J. (2017). Licensing delineates helper and effector NK cell subsets during viral  
631 infection. *JCI insight* 2, e87032.
- 632 Zhou, G., Juang, S.W.W., and Kane, K.P. (2013). NK cells exacerbate the pathology of influenza  
633 virus infection in mice. *European journal of immunology* 43, 929-938.
- 634



635 **Figure Legends**

636

637 **Figure 1. Primary influenza infection induces rapid weight loss and NK cell activation in**  
638 **lung but vaccination reduces weight loss and lung viral burden.** C57BL/6 female mice were  
639 challenged intranasally with 5 hemagglutination units (HAU) of influenza A/California/4/2009  
640 (Flu) or mock treated with DPBS (Mock). Four weeks prior to challenge, mice were vaccinated  
641 intraperitoneally with the trivalent Sanofi influenza vaccine (Vac). **(A)** Weight loss over 4 days.  
642 **(B-E)** At day 4 post infection, lungs were excised and cell-free supernatant was analyzed by  
643 qPCR for influenza viral burden (plotted against a dose curve of Flu with known HAU, giving  
644 HAU equivalents) **(B)** and plotted against weight loss **(C)**. Data fitted to a non-linear regression  
645 line with R square value shown **(C)**. **(D-E)** Lung cell pellets were analyzed by flow cytometry for  
646 **(D)** cellular abundance and **(E)** Natural Killer (NK) activation markers. Weight loss and viral  
647 burden data are a pool of two independent experiments (n=8-9/group), while flow data is one  
648 experiment (n=5/group). Dots represent individual mice with bars showing mean. Line data  
649 shown as mean±SEM. Significance determined by Mann-Whitney U test.

650

651 **Figure 2. NK cell depletion reduces lung viral burden and increases weight loss in**  
652 **vaccinated, influenza-challenged mice.** Transgenic C57BL/6 mice with NKp46 driven  
653 expression of diphtheria toxin (DT) receptor were vaccinated 28 days prior to intranasal influenza  
654 (flu) challenge, as in Fig. 1. **(A)** Immediately prior to infection, a subset of mice received two  
655 intraperitoneal injections of DT (1.25 µg). **(B)** Levels of NK1.1+, NKp46+ NK cells in the lung,  
656 as a proportion of singlet, live leukocytes at 4 days post infection (necropsy, nx). **(C)** Circulating  
657 IgG antibodies to both the vaccine and challenge virus with or without DT treatment at 4 days  
658 post infection. **(D)** Lung cell-free supernatants were analyzed by qPCR for influenza viral burden

659 (plotted against a dose curve of IFA with known HAU, giving HAU equivalents). **(E-F)** Weight  
660 loss at day 4 in Male (E) and female (F) mice. **(G)** Weight loss followed for 14 days post  
661 challenge. (D-E) A pool of two independent experiments (n=8-9/group), while (B-C) is one  
662 experiment (n=5/group); all mice were male {M}. (F) A pool of three experiments (n=9-  
663 13/group) and (G) one experiment (n=4-5/group); all mice were female {F}. Dots represent  
664 individual mice with bars showing mean. Line data shown as mean±SEM. Significance  
665 determined by Mann-Whitney U test, ns = not significant. \* represents p<0.05.

666  
667 **Figure 3. NK cell depletion reduces lung viral burden and lung IFN- $\gamma$  in vaccinated,**  
668 **influenza-challenged mice.** Four days post infection in the model described in Fig. 2A, **(A)**  
669 Lung RNA was analyzed by qPCR for influenza viral burden (plotted against a dose curve of IFA  
670 with known HAU, giving HAU equivalents per 5ug RNA tested). **(B-C)** Transcript levels of  
671 inflammatory cytokine genes **(B)** *Il6* and *Ifn $\gamma$*  and **(C)** neutrophil-related chemokines *Cxcl1* and  
672 *Cxcl2*, along with neutrophil lipocalin protein (*Lcn2*). RNA induction normalized to  
673 housekeeping gene  $\beta$ -actin and displayed as induction over mock-treated control mice. **(D)**  
674 Plasma levels of IL-6 (pg/mL). **(E)** IL-6 levels in lung supernatants after whole lung enzymatic  
675 digestion for single cell isolation and viral burden quantification. (A-E) A pool of two  
676 independent experiments (n=5-9/group; (A-D) were female {F} and (E) were male {E} mice  
677 used for single cell isolation). Dots represent individual mice with bars showing mean.  
678 Significance determined by Mann-Whitney U test, ns = not significant. Spearman correlation  
679 coefficient shown.

680  
681 **Figure 4. NK cell depletion in vaccinated, influenza-challenged mice does not alter**  
682 **pathology.** Four days post infection in the model described in Fig. 2A, whole lungs were excised,

683 stored in 10% formalin, and embedded on paraffin for hematoxylin and eosin staining. Pathology  
684 was scored for: **(A)** Inflammation (vasculitis, bronchiolitis, and alveolitis), Edema (perivascular,  
685 peribronchiolar, and alveolar), Leukocytes and Neutrophils (in perivascular space,  
686 peribronchiolar space, and alveolar wall). Full scoring details in supplementary files. Pathology  
687 scored from a pool of two independent experiments (n=5-9/group); all female {F} mice. Dots  
688 represent individual mice with bars showing mean. Significance determined by Mann-Whitney  
689 test, ns = not significant. **(B)** Representative photomicrographs of pathological changes observed.  
690 Arrows, bronchiolitis with exudates in bronchiolar lumina. \* Perivascular and peribronchiolar  
691 edema. Scale bar in mock equals 50  $\mu$ m.

692

693 **Figure 5. NK cell depletion in vaccinated, influenza-challenged mice increases lung**  
694 **neutrophil infiltration.** Four days post infection in the model described in Fig. 2A, whole lungs  
695 were excised and single cells isolated for flow cytometry. **(A)** Proportion (%) of CD3+ T cells  
696 and active (CD69+) CD3+ T cells, as determined from singlet, live lung leukocytes. Proportion  
697 (%) of **(B)** CD19+ B cells, **(C)** Ly6C-high inflammatory monocytes, and **(D)** Ly6G+ neutrophils,  
698 with neutrophils plotted against weight loss **(E)**. (A) T cell data from a pool of two independent  
699 experiments (n=7-10/group); all mice were male {M}. (B-E) Data a pool of three independent  
700 experiments (n=7-10/group of male {M} mice) and (n=4-5/group of female {F} mice). Dots  
701 represent individual mice, with bar representing mean. Significance determined by Mann-  
702 Whitney U test, ns = not significant. Spearman correlation coefficient and p-value shown.

703

704 **Figure 6. Depletion of NK cells after vaccination, and subsequent repopulation, does not**  
705 **alter lung viral burden, disease severity or systemic inflammation after challenge.** **(A)**  
706 Transgenic C57BL/6 mice with NKp46 driven expression of diphtheria toxin (DT) receptor were

707 vaccinated 42 days (d) prior to intranasal influenza (Flu) challenge and treated with DT (NK-  
708 depleted) 21 days prior to challenge with necropsy (nx) at 4 days post influenza challenge. **(B)**  
709 At 3 and 21 days post DT treatment, lungs were excised and single cells isolated for flow  
710 cytometry for the proportion (%) of NK1.1+, NKp46+ NK cells. **(C)** Weight loss at 4 days post  
711 influenza challenge. **(D)** Lung cell-free supernatants were analyzed by qPCR for influenza viral  
712 burden (plotted against a dose curve of Flu with known HAU, giving HAU equivalents). **(E)**  
713 Plasma levels of IL-6 (pg/mL). **(B)** NK cell depletion data a pool of two independent  
714 experiments, (n=2/group of male {M} mice) and (n=5-6/group of female {F} mice). **(C-D)** Data a  
715 pool of two independent experiment (n=4-10/group); all male {M} mice. Dots represent  
716 individual mice with bars showing mean. Significance determined by Mann-Whitney test, ns =  
717 not significant.

718

719 **Figure 7. Summarized model of changes seen with influenza vaccination and challenge with**  
720 **NK cell depletion.** **(A)** Influenza virus infection in naïve mice results in robust lung pathology,  
721 characterized by interferon (IFN)- $\gamma$  mRNA and inflammatory monocytes (%Ly6C-high) influx  
722 with rapid weight loss at 4 days post infection. **(B)** Vaccination with the human Sanofi trivalent  
723 influenza vaccine reduces lung viral burden, pathology and monocytes with minor weight loss  
724 (4%). **(C)** In unvaccinated, naïve animals which were infected with influenza, NK cell depletion  
725 reduced viral burden, IFN- $\gamma$  mRNA, pathology, and monocyte influx. However, these mice still  
726 progressed to 20% weight loss by day 4 post infection. **(D)** In vaccinated mice which were  
727 lacking NK cells, influenza virus burden was reduced even further and robust IFN- $\gamma$  from  
728 vaccination now lower, yet total pathology score was similar to NK intact mice – however with  
729 PMNs now increased in frequency in the lung by flow cytometry. Despite a reduced viral burden,  
730 these animals showed sustained weight loss at 11%. Model created with BioRender.

731

732 **Tables:**

733 Table 1: Methods of NK depletion during acute influenza infection.

| Author                             | Mouse Strain    | Mouse Sex     | Flu Strain                     | Dose of Flu Challenge                                                                              | NK Depletion                                                            | Main Findings                                                                                                                                                                                     |
|------------------------------------|-----------------|---------------|--------------------------------|----------------------------------------------------------------------------------------------------|-------------------------------------------------------------------------|---------------------------------------------------------------------------------------------------------------------------------------------------------------------------------------------------|
| (Gazit et al., 2006)               | 129/Sv, C57BL/6 | Not specified | A/PR/8/34 (H1N1)               | 3x10 <sup>3</sup> PFU (or 0.12 HAU), 60-70% survival in WT                                         | NCR1-gfp knockout                                                       | Loss of NCR1 (NKp46) results in lethal infection (0% survival)                                                                                                                                    |
| (Zhou et al., 2013)                | C57BL/6         | Female        | A/PR/8/34 (H1N1)               | 5 HAU - 0% survival (in WT)<br>0.5 HAU - 30% survival (in WT)<br>0.0625 HAU - 80% survival (in WT) | Anti NK1.1*                                                             | High dose (5 HAU) infection + NK cell depletion improves survival.<br><br>Medium dose (0.5 HAU) infection + depletion decreases survival.<br><br>Low dose (0.0625 HAU) + depletion has no effect. |
| (Abdul-Careem et al., 2012)        | C57BL/6 BALB/C  | Male          | A/PR/8/34 (H1N1)               | 5x10 <sup>3</sup> PFU (i.n.)<br>0% survival (in WT)                                                | IL-15 <sup>-/-</sup> KO mice, anti-NK1.1*, anti-asialo GM1 <sup>†</sup> | NK cells depleted with anti-NK1.1 or anti-asialo GM1, and IL-15 <sup>-/-</sup> KO mice had increased survival and lower weight loss compared to WT                                                |
| (Nakamura et al., 2010)            | C57BL/6         | Not specified | Mouse-adapted A/FM/1/47 (H1N1) | 1000 PFU (i.n.)<br>0% survival in WT                                                               | IL-15 <sup>-/-</sup> KO mice <sup>‡</sup>                               | IL-15 deficiency improved survival of virus infected mice                                                                                                                                         |
| (Stein-Streilein and Guffee, 1986) | B6D2F1          | Female        | A/PR/8/34 (H1N1)               | 0.125 HAU (intratracheal)<br>50% survival in WT mice.                                              | Anti-asialo GM1 <sup>†</sup>                                            | NK cell depleted mice (and hamsters) had decreased survival to infection and increased viral titers                                                                                               |
| (Nogusa et al., 2008)              | C57BL/6         | Male          | A/PR/8/34 (H1N1)               | 10 <sup>4</sup> TCID50 HAU                                                                         | Anti-NK1.1*                                                             | Mice depleted of NK cells lost significantly more weight than infected WT young mice and had greater viral loads.                                                                                 |
| (Kos and Engleman, 1996)           | C57BL/6         | Female        | A/WSN                          | 1000 HAU (i.p)                                                                                     | Anti-NK.1.1*                                                            | NK cells were essential for the induction of influenza virus-specific CTL responses                                                                                                               |

734 Note: Such methods of NK cell depletion have been shown not to be specific. \*NK1.1 is also used as a marker of NKT cells and

735 <sup>†</sup>anti-asialo GM1 can not only recognize T cells, but administration can also lead to basophil depletion (Nishikado et al., 2011).

736 <sup>‡</sup>IL-15 KO mice, while primarily exhibiting an NK cell deficiency, also suffer from T cell deficiencies and impaired lymphocyte

737 trafficking (Lodolce et al., 1998;Itsumi et al., 2009). Therefore, we used NKp46 expression as the basis for NK cell depletion, as

738 it has been shown to be expressed by mouse NK cells (Biassoni et al., 1999), but also some type 1 innate lymphoid cells (Cortez

739 and Colonna, 2016).

740

741 Table 2: Antibodies and dyes used for flow cytometry

| Antigen               | Clone          |
|-----------------------|----------------|
| Zombie Aqua Dead/Live | Not Applicable |
| CD16.2                | 9e9            |
| NKp46 (CD335)         | 29A1.4         |
| CD19                  | 6D5            |
| CD3                   | 145.2C11       |
| CD11b                 | M1/70          |
| NK1.1                 | PK136          |
| CD69                  | H1.2F3         |
| CD107a                | 1D4B           |
| Ly6C                  | HK1.4          |
| Ly6G                  | 1A8            |

742

743 Table 3: Primers used for lung qPCR

| Gene           | Forward (Sense)          | Reverse (Antisense)      |
|----------------|--------------------------|--------------------------|
| $\beta$ -Actin | AGAGGGAAATCGTGCGTGAC     | CAATAGTGATGACCTGGCCGT    |
| IL-6           | GCACAACCTTTTTCTCATTTCACG | GCCTTCCCTACTTCACAAGTCCG  |
| IFN- $\gamma$  | CAACAGCAAGGCGAAAAAGGATGC | CCCCGAATCAGCAGCGACTCC    |
| CXCL1          | GCTTGCCTTGACCCTGAAGCTC   | TGTTGTCAGAAGCCAGCGTTCAC  |
| CXCL2          | CGCCCAGACAGAAGTCATAGCCAC | TCCTTCCAGGTCAGTTAGCCTTGC |
| LCN2           | ACATTTGTTCCAAGCTCCAGGGC  | CATGGCGAACTGGTTGTAGTCCG  |

744

745

746

747

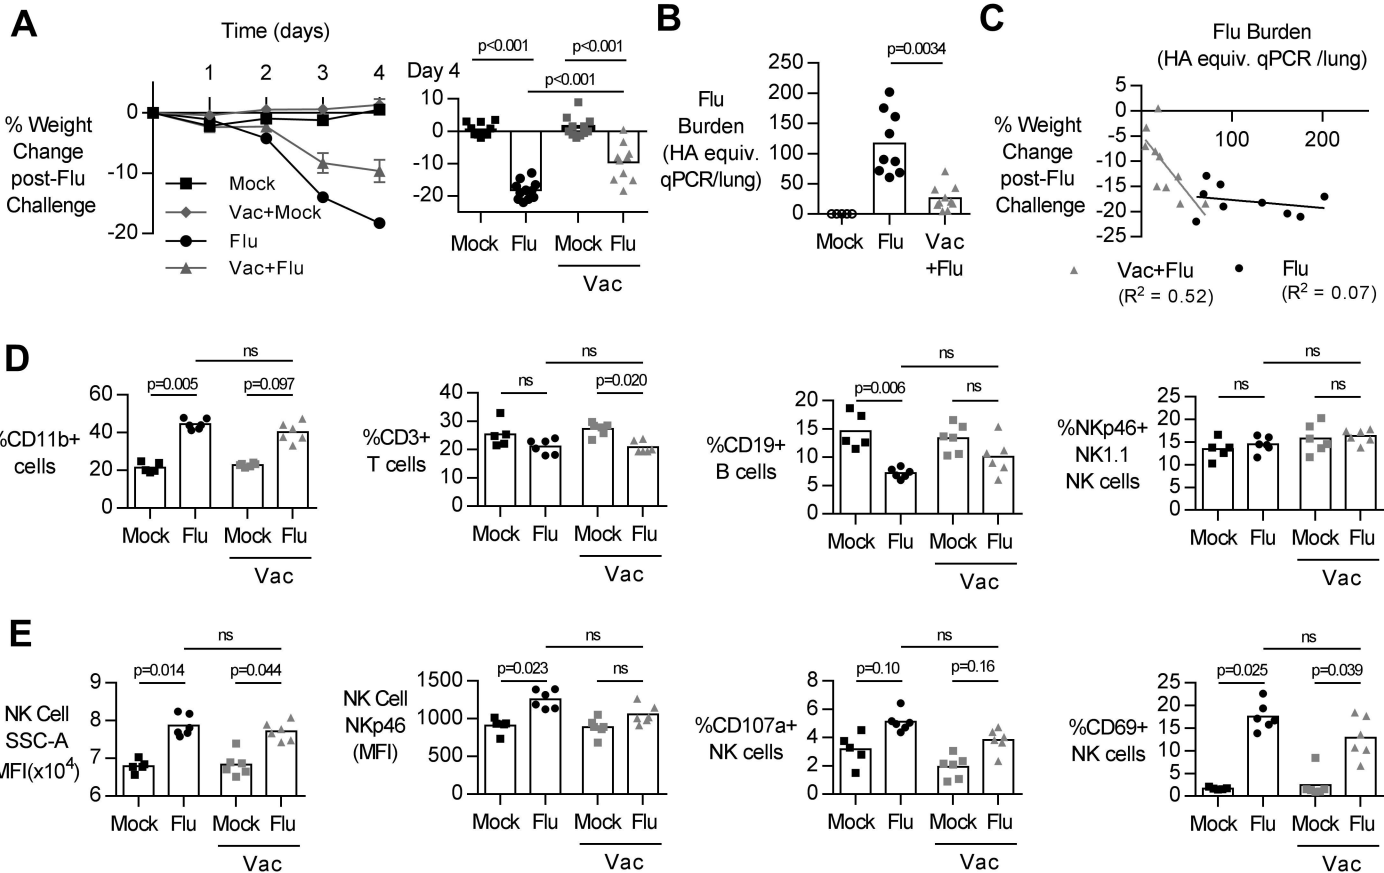



**A**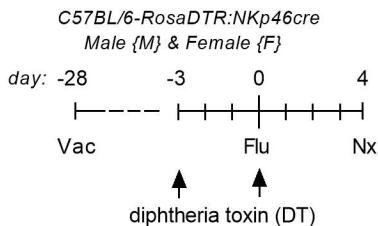**B**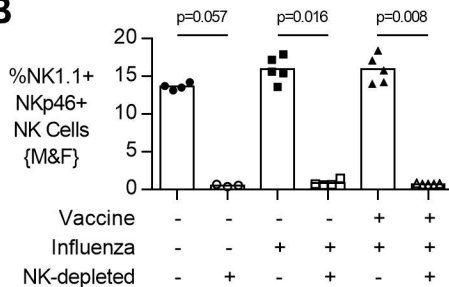**C**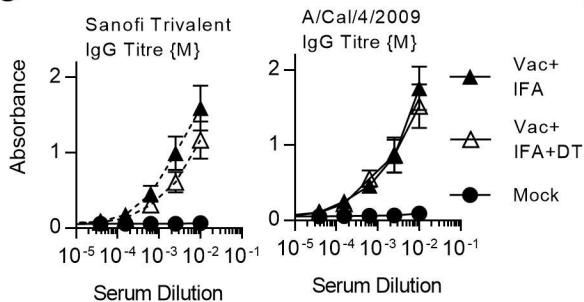**D**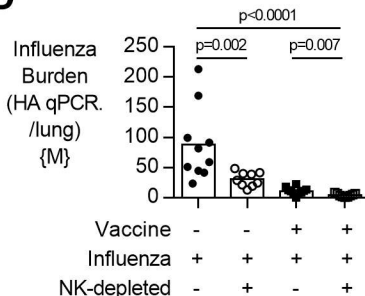**E**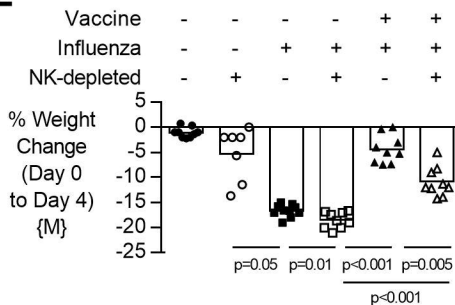**F**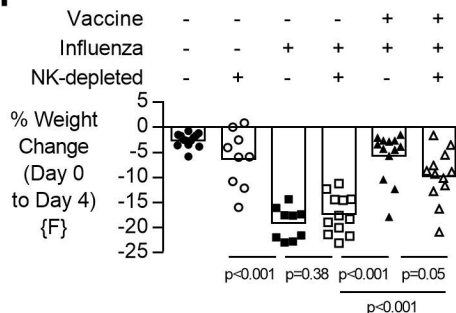**G**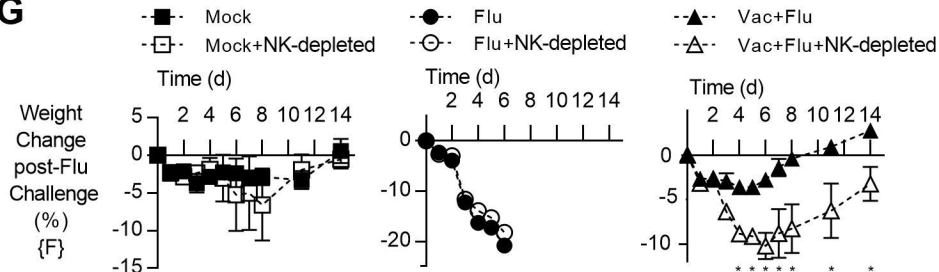

**A**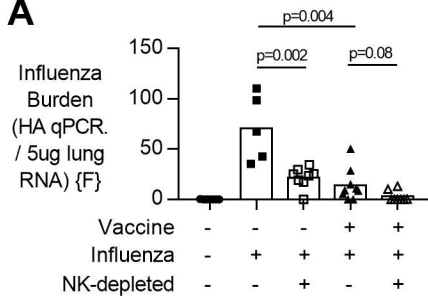**B**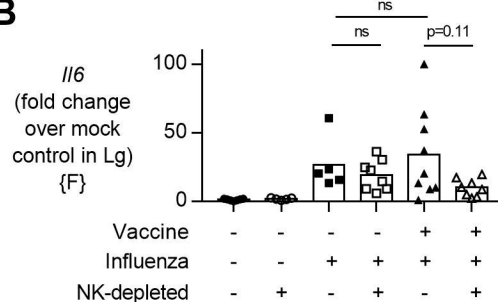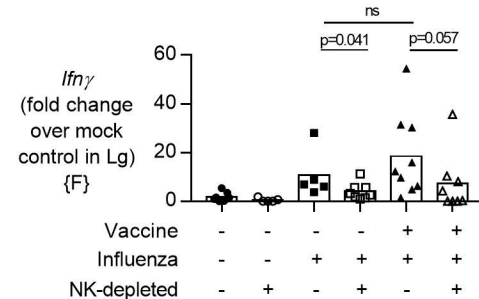**C**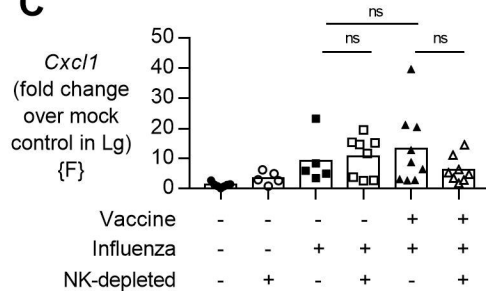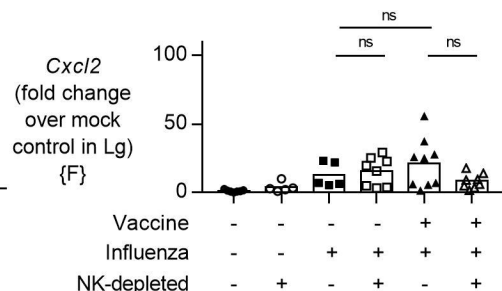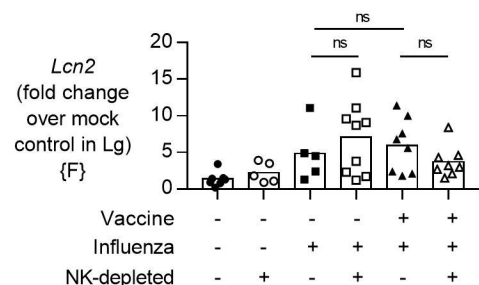**D**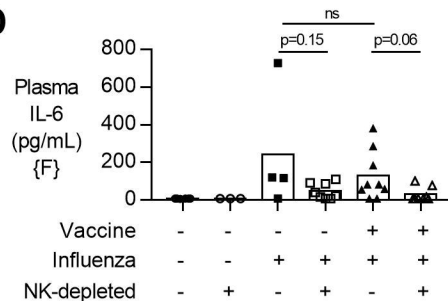**E**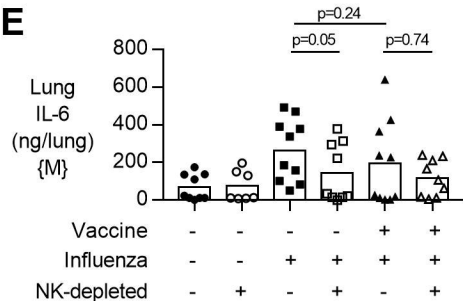

**A**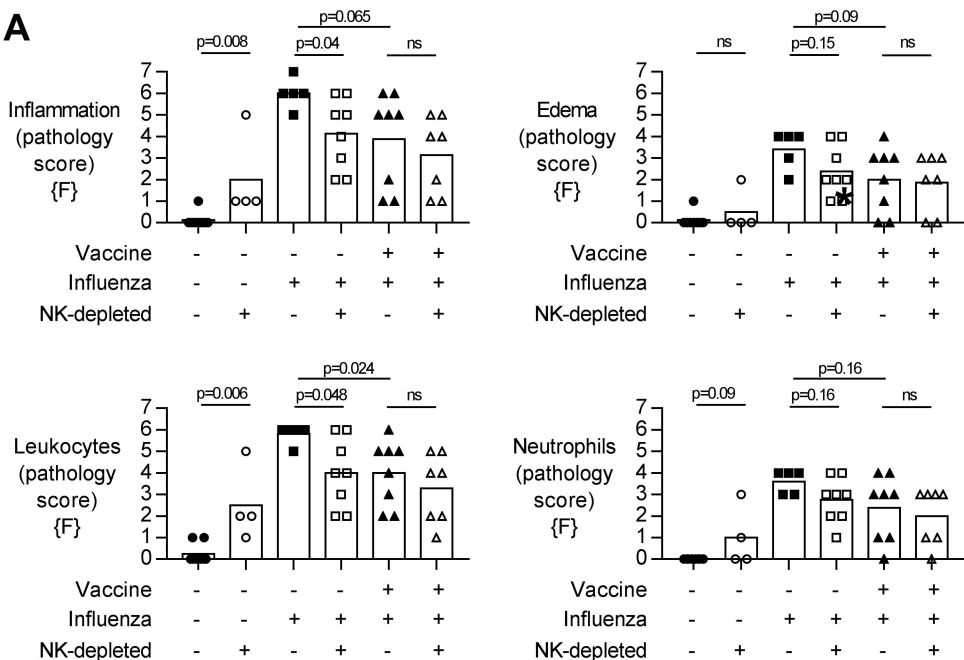**B**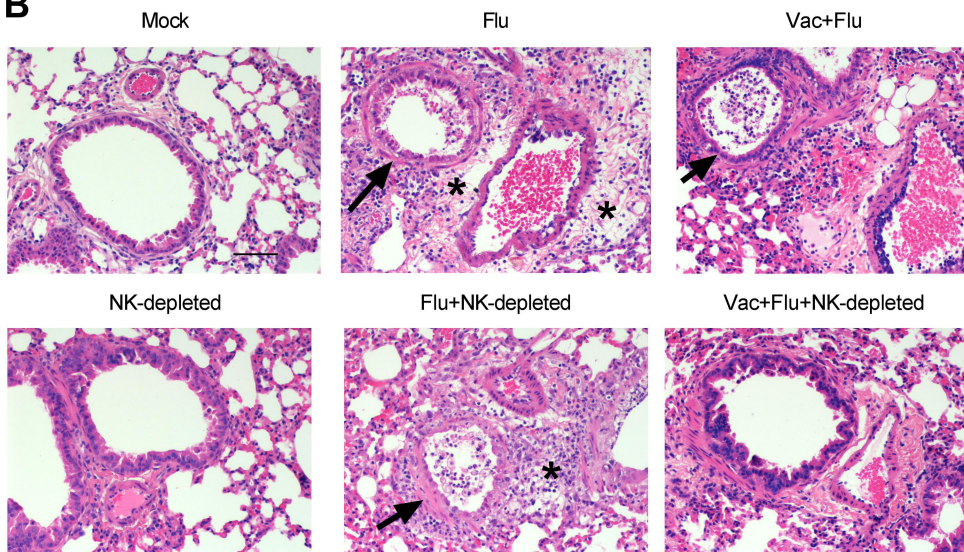

**A**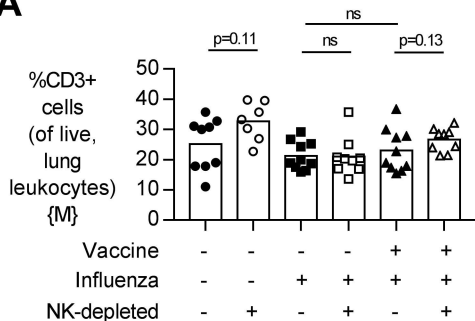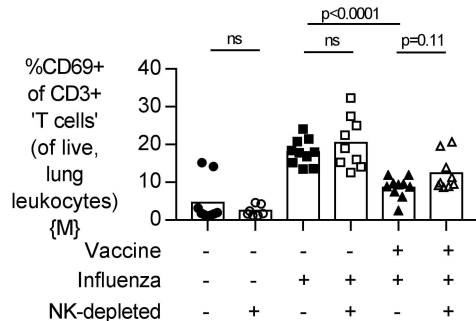**B**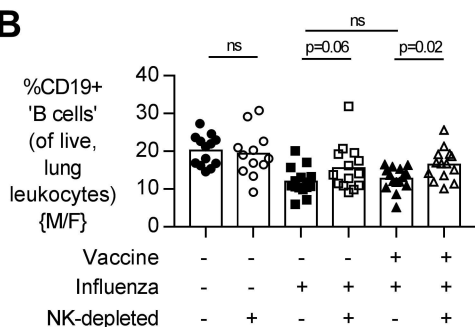**C**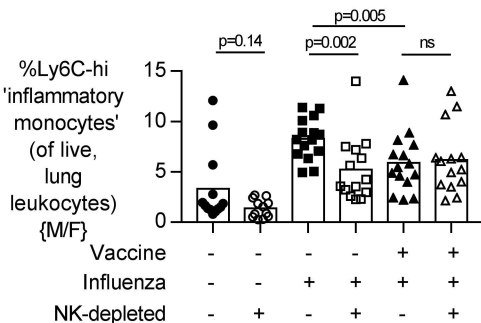**D**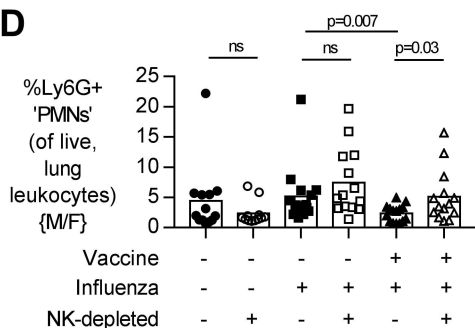**E**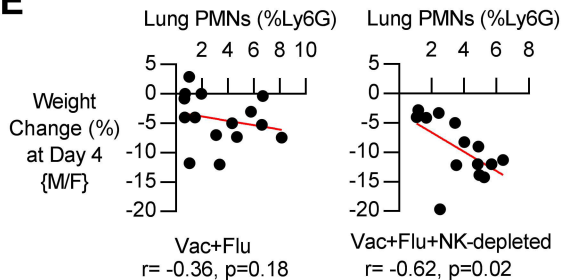



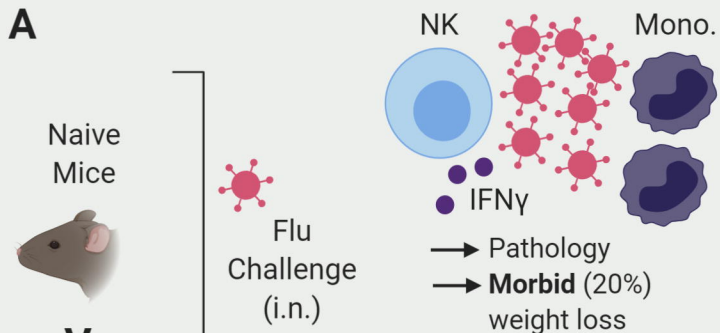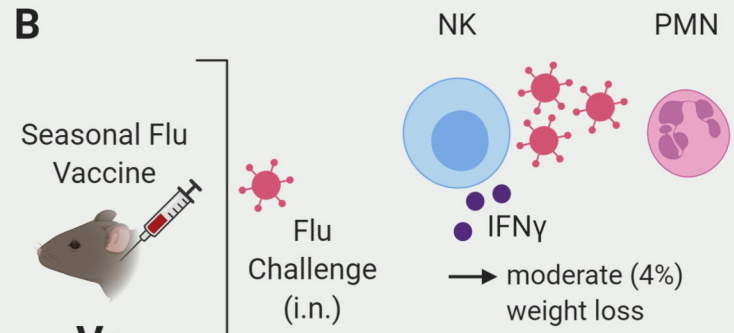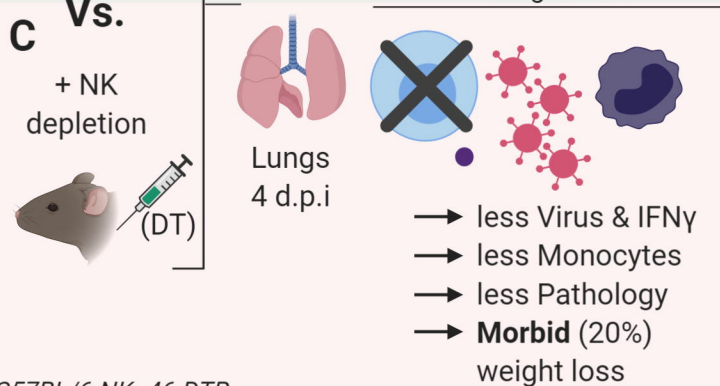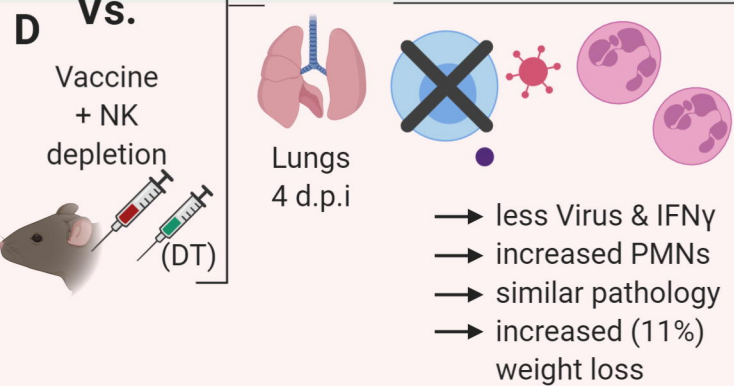

Source: https://www.biorxiv.org/content/10.1101/846626v1.full.pdf
